# Supplementary material for: Improvement of the KarstMod modeling platform for a better assessment of karst groundwater resources
Source: Copernicus journal article supplement (doi:10.5194/hess-2023-17), 2023-02-28
Supplement: Supplementary file [file hess-2023-17-AC2-supplement.pdf]

Line 12: as stated by White (1999) that “a karst aquifer is a triple porosity medium, consisting of the rock matrix (intergranular porosity), the fractures and bedding planes and the karstic conduits” (Gondwe, 2011, p. 25)

We also include the reference from White 1999.

Line 25: karst in a coastal or island geographic context where these contaminants in addition to salts are of significant concern. Is the concept of density difference flow regimes considered in this research/application of KarstMod?

KarstMod do not include any feature related to the concept of density difference. KarstMod has not yet been applied in context with potential salt intrusion. Therefore, coastal or island geographic context are not mentioned in the text to avoid any confusion for the reader.

Figure 1: Figure 1 is not fully described in the caption? a,b,c & d?

We added some descriptions in the caption for figure 1.

Line 131: Ref?

We provided additional references.

Line 135: redundant from previous page....

We removed the redundant part in the manuscript.

Line 141: move Figure 2 up in text to page 6

We provided an additional figure with the complete KarstMod environment for the reference to the various options such that it appears clearer to the reader.

Line 175: are these tools described below, line 185? If so, insert a heading and ref in text....

The tools for model evaluation are presented in the complete section “3.3. Model evaluation”. We added the figure 1 to show the complete KarstMod software. The text now includes reference to this figure to indicate where the corresponding tools can be found.

Figure 4: scale for PET

Figure has been modified accordingly.

Figure 7: scale for PET

Figure has been modified accordingly.

Figure 8: legend + ref in the text

Legend has been changed.
